# Supplementary material
Source: PubMed Central journal article supplement (PMC8462456)

Supplementary Fig. 1 Effects of circ-ERBB2 silencing on protein levels of PCNA, cleaved-caspase 3, and MMP9 in MDA-MB-231 and MDA-MB-468 cells were analyzed by western blotting. \* $P < 0.05$ .

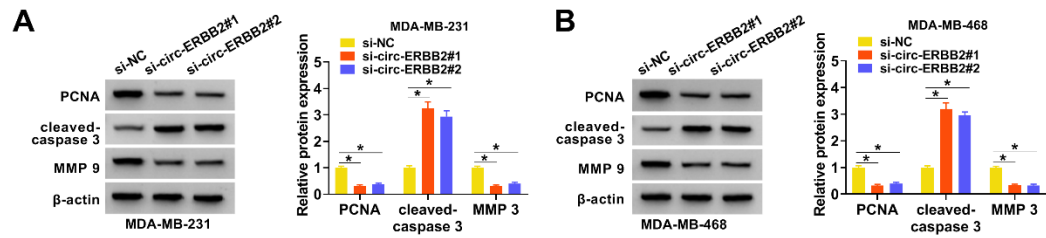

Supplement: mcb.00609-20-s0001.pdf [file mcb.00609-20-s0001.pdf]
